# Supplementary material for: Integrative omics framework for characterization of coral reef ecosystems from the Tara Pacific expedition
Source: PubMed Central journal article supplement (PMC10235121; doi:10.1038/s41597-023-02204-0), 2023-06-01
Supplement: 41597_2023_2204_MOESM1_ESM.pdf [file 41597_2023_2204_MOESM1_ESM.pdf]

# Integrative omics framework for characterization of coral reef ecosystems from the *Tara Pacific* expedition

## Supplementary Figures and Tables

**Supplementary Figure 1:** Multiplexing strategies for Metabarcoding experiments.

**Supplementary Figure 2:** Control quality workflow for Metagenomic and Metatranscriptomic sequences.

**Supplementary Figure 3:** Control quality workflow for Metabarcoding sequences.

**Supplementary Figure 4:** Control quality workflow for Metabarcoding negative control sequences.

**Supplementary Figure 5:** RNA samples classification depending on their Agilent BioAnalyzer profile.

**Supplementary Figure 6:** Global view of the statistics generated by the control quality pipeline on a subset of sequences of each sequencing file.

**Supplementary Figure 7:** Taxonomic assignment of a sequencing file.

**Supplementary Figure 8:** Final report on the comparison between a Metabarcoding sample and negative controls.

**Supplementary Table 1:** List of abbreviations used in this study.

**Supplementary Table 2:** Barcode Identifier (BID) sequences.

**Supplementary Table 3:** PCR mixtures for Metabarcoding experiments.

**Supplementary Table 4:** PCR amplification cycling protocols for Metabarcoding experiments.

**Supplementary Figure 1:** Multiplexing strategies for Metabarcoding experiments. The multiplexing including BIDs allowed pooling of 6 to 12 PCR products in the same sequencing library.

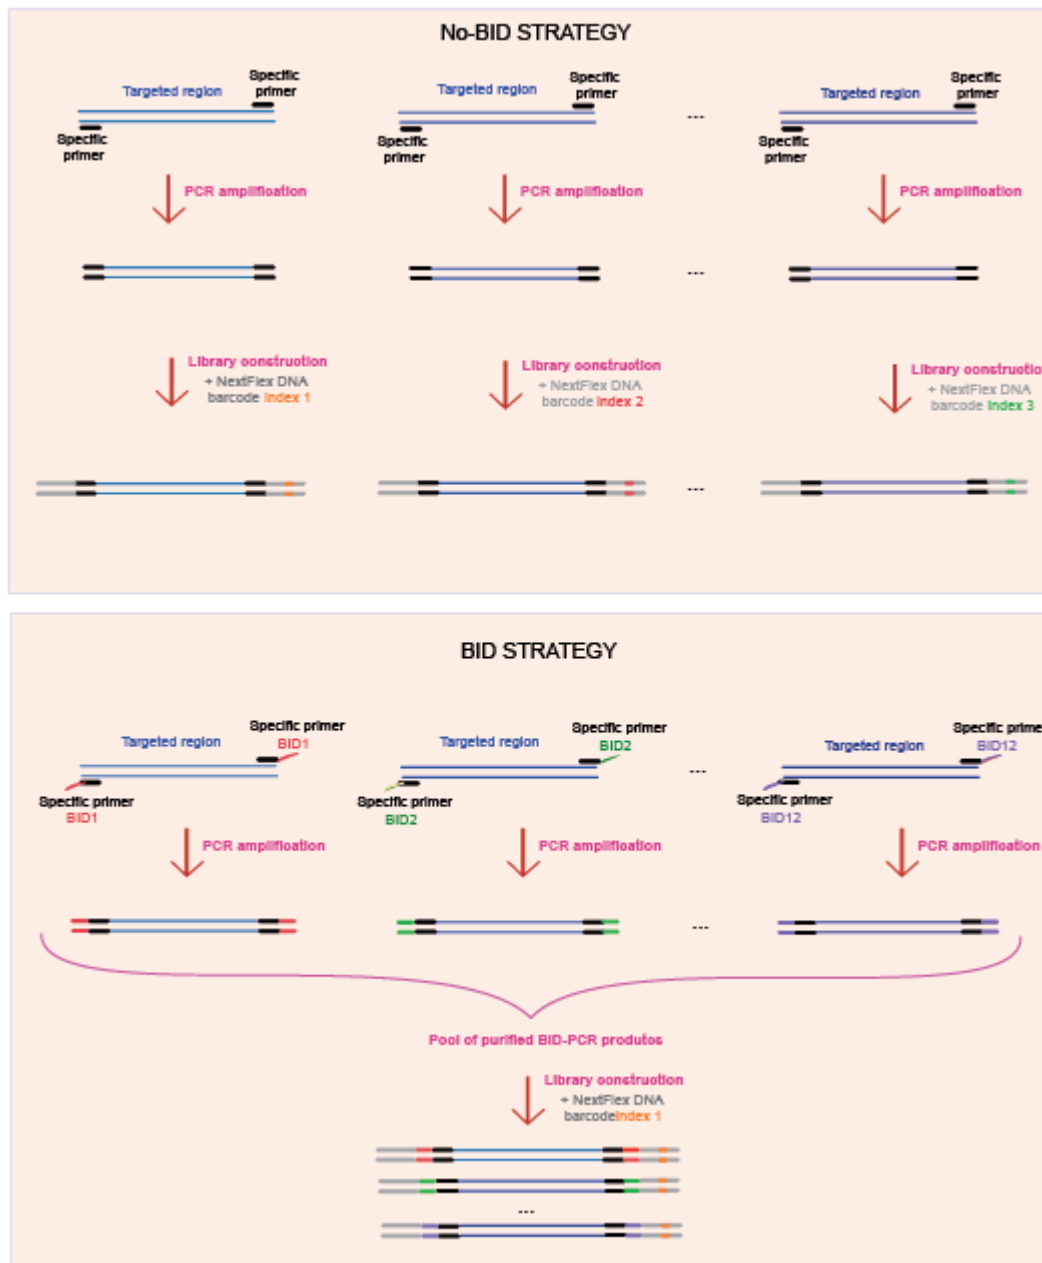

**Supplementary Figure 2:** Control quality workflow for Metagenomic and Metatranscriptomic sequences.

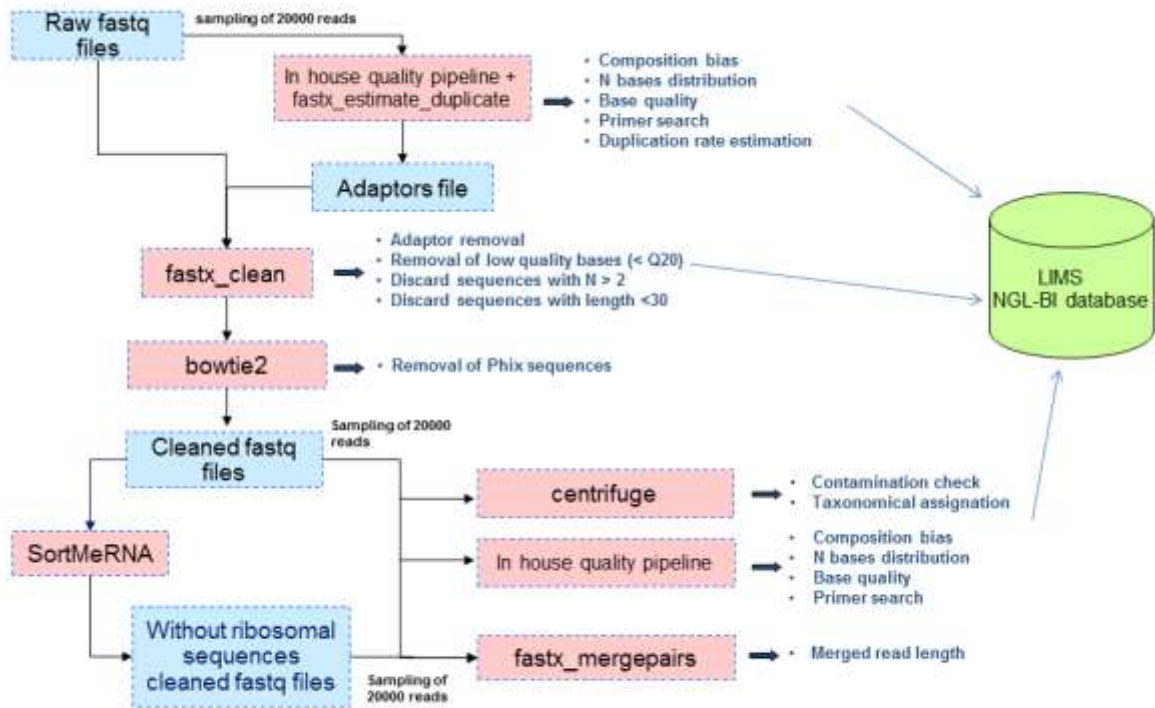

Supplementary Figure 3: Control quality workflow for Metabarcoding sequences.

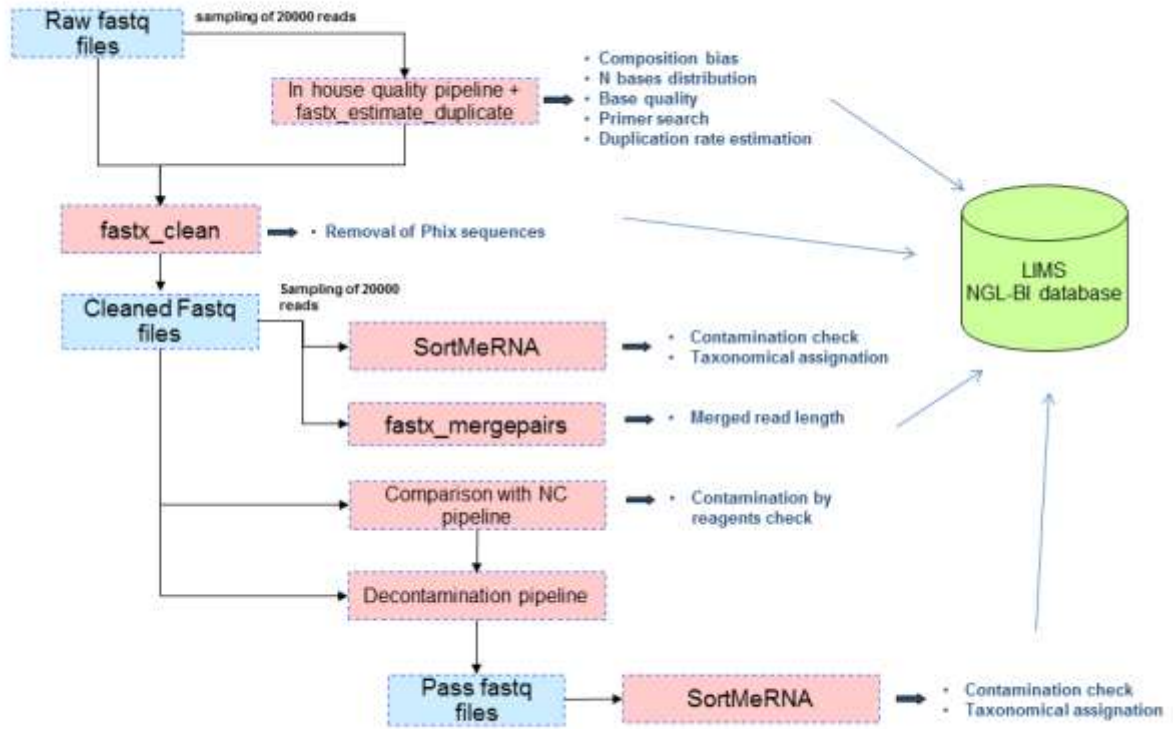

**Supplementary Figure 4:** Control quality workflow for Metabarcoding negative control sequences.

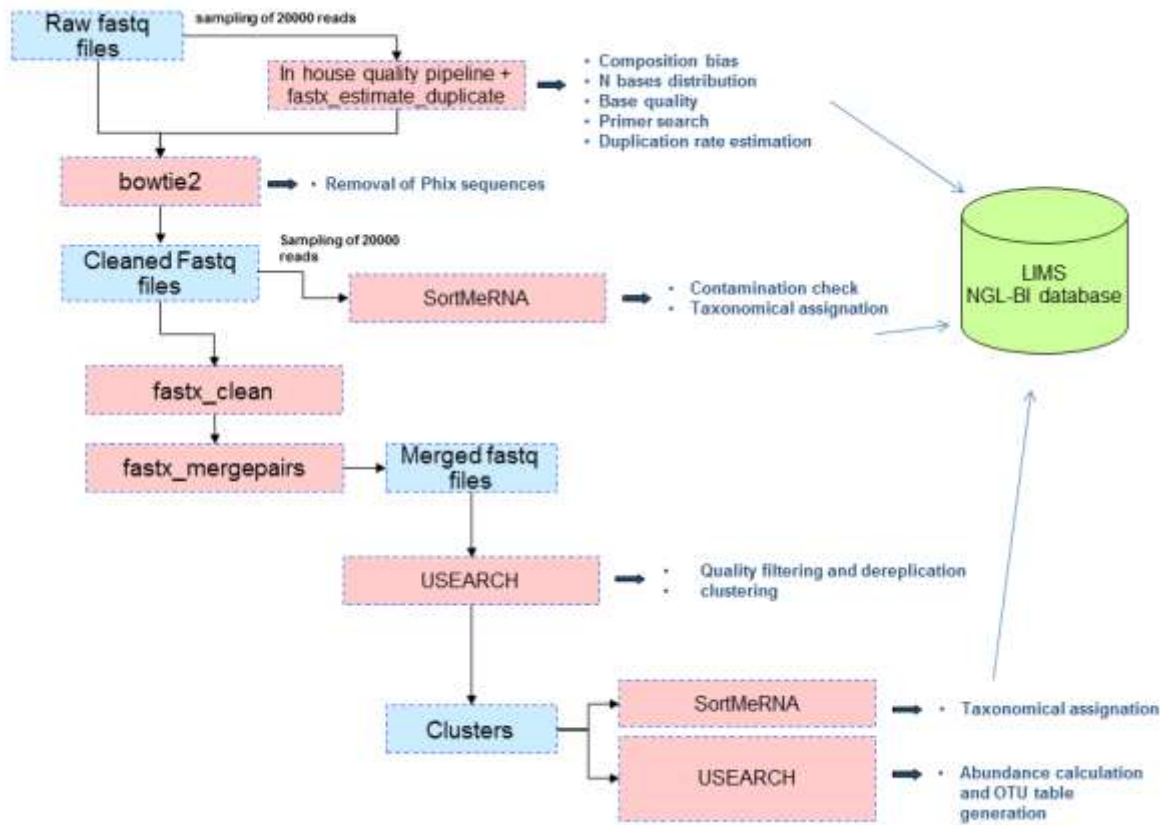

**Supplementary Figure 5:** RNA samples classification depending on their Agilent BioAnalyzer profile. Coral RNA samples exhibit different profiles: green profiles show high integrity of RNA, yellow and orange profiles exhibit rRNA peaks, but also variable amounts of small sized RNA and the red profile a rather comprehensive degradation of RNA.

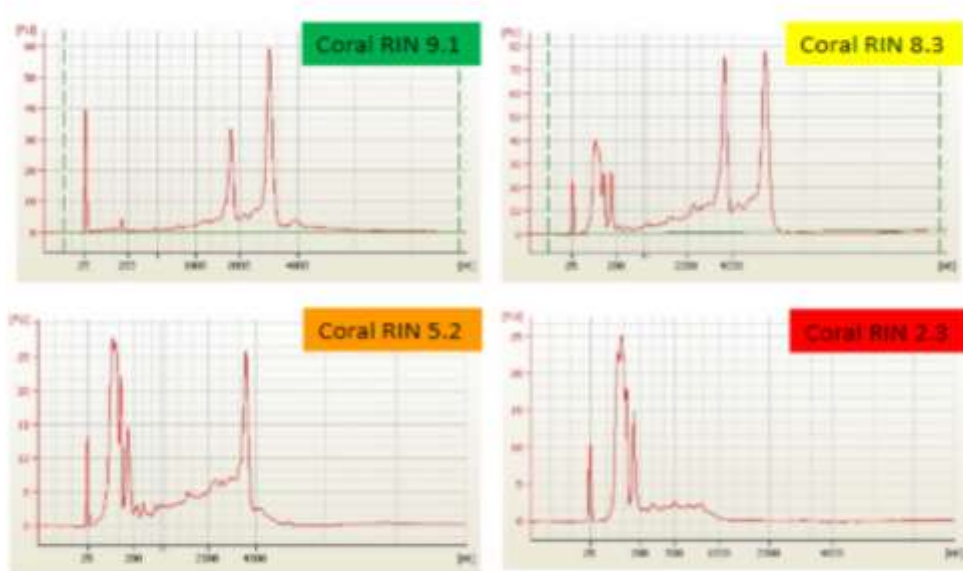

**Supplementary Figure 6:** Global view of the statistics generated by the control quality pipeline on a subset of sequences of each sequencing file. a) table containing the number of obtained sequences and the global quality score. b) plot of the Q30 score along the sequences. c) Nucleotides distribution along the reads (Read 1 and Read 2). d) Detection of the adapters used during the sequencing library process (Read 1 and Read 2). e) Table containing the statistics after quality trimming of the sequences. f) Tables containing the statistics after removal of rRNA reads in Meta and Dual Transcriptomics sequencing files. g) Estimation of the duplication rate. h) Table containing statistics after the merging process. The figure presents the distribution size of the merged sequences.

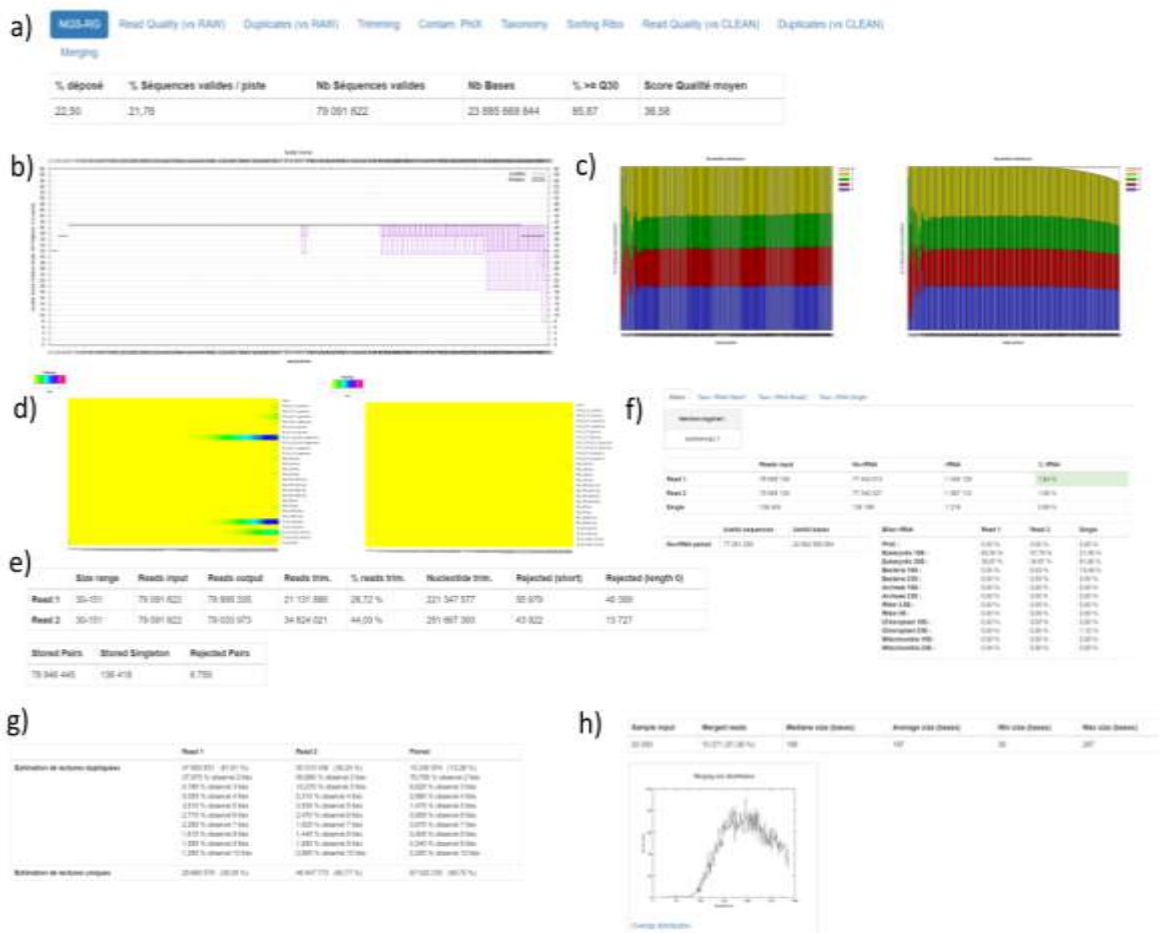

**Supplementary Figure 7:** Taxonomic assignment of a sequencing file. Taxonomic assignment was performed on a subset of reads from each sequencing dataset. Results allowed the validation of the sequencing files.

a)

| Taxonomie                |                      |                                                             |
|--------------------------|----------------------|-------------------------------------------------------------|
| Nb Seq (échantillonnage) | Organisme            | Taxonomie                                                   |
| 20 000                   | marine<br>metagenome | unclassified sequences; metagenomes; ecological metagenomes |

| Bilan par taxon                              |         |         |
|----------------------------------------------|---------|---------|
| Seuil Taxon (% vs nt) 0.2                    |         |         |
| Taxon                                        | Nb Seq. | %       |
| Unknown: No hits                             | 17 404  | 87.02 % |
| <i>Podospira darwini</i>                     | 207     | 1.03 %  |
| unclassified Prochlorococcus                 | 168     | 0.84 %  |
| <i>Prochlorococcus marinus</i> str. MIT 9312 | 110     | 0.55 %  |
| <i>Prochlorococcus marinus</i>               | 104     | 0.52 %  |
| <i>Candidatus Ferroglobus</i> sp. R329       | 102     | 0.51 %  |
| <i>Prochlorococcus marinus</i> str. MIT 9218 | 94      | 0.47 %  |
| <i>Prochlorococcus marinus</i> str. A29601   | 89      | 0.45 %  |
| <i>Prochlorococcus marinus</i> str. MIT 9301 | 88      | 0.44 %  |

| Bilan par division |         |         |
|--------------------|---------|---------|
| Division           | Nb Seq. | %       |
| Bacteria           | 2 119   | 10.60 % |
| Eukaryota          | 351     | 1.75 %  |
| Viruses            | 113     | 0.56 %  |
| Archaea            | 8       | 0.04 %  |

| Bilan par mot-clé |         |        |
|-------------------|---------|--------|
| Mot-clé           | Nb Seq. | %      |
| Fungi             | 4       | 0.02 % |

b)

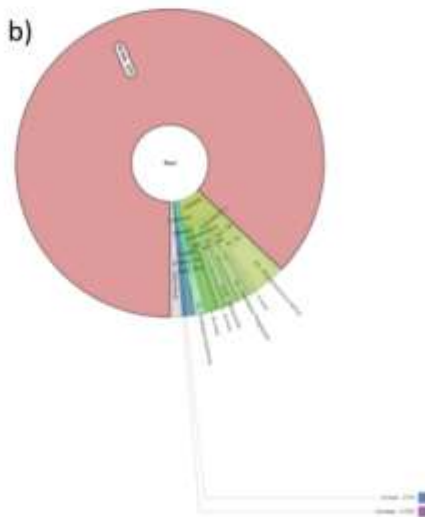



**Supplementary Figure 8:** Final report on the comparison between a metabarcoding sample and negative controls.

| - PCR1                                                   |                                                    |           |                    |                    |                                                                                                          |          |                |  |
|----------------------------------------------------------|----------------------------------------------------|-----------|--------------------|--------------------|----------------------------------------------------------------------------------------------------------|----------|----------------|--|
| Cluster                                                  | OTU                                                | Abundance | Abundance readet % | Abundance témoin % | Taxonomy                                                                                                 | % id     | % match length |  |
| BUW_AEVOOSTA_2_1_HHHYMDRXX.12BA218-BID02_clean.Cluster1  | CEB_BABOSTA_2_1_HHHYMDRXX.12BA206-BID17.Cluster15  | 257 647   | 18.82              | 0.09               | Eukaryota, Opisthokonta, Holozoa, Metazoa, Animalia, Craniata<br>---                                     | 100.00 % | 100.00 %       |  |
| BUW_AEVOOSTA_2_1_HHHYMDRXX.12BA218-BID02_clean.Cluster2  | CEB_BABOSTA_2_1_HHHYMDRXX.12BA206-BID17.Cluster59  | 237 523   | 17.38              | 0.11               | Eukaryota, Opisthokonta, Holozoa, Metazoa, Animalia, Craniata<br>---                                     | 100.00 % | 100.00 %       |  |
| BUW_AEVOOSTA_2_1_HHHYMDRXX.12BA218-BID02_clean.Cluster20 | CEB_BABOSTA_2_1_HHHYMDRXX.12BA206-BID17.Cluster25  | 3 807     | 0.28               | 0.09               | Bacteria, Proteobacteria, Alphaproteobacteria, Caulobacteriales, Caulobacteraceae, uncultured            | 99.80 %  | 100.00 %       |  |
| BUW_AEVOOSTA_2_1_HHHYMDRXX.12BA218-BID02_clean.Cluster51 | CEB_BABOSTA_2_1_HHHYMDRXX.12BA206-BID17.Cluster114 | 3 459     | 0.25               | 0.05               | Bacteria, Proteobacteria, Alphaproteobacteria, Caulobacteriales, Caulobacteraceae, uncultured            | 99.20 %  | 100.00 %       |  |
| BUW_AEVOOSTA_2_1_HHHYMDRXX.12BA218-BID02_clean.Cluster23 | CEB_BABOSTA_2_1_HHHYMDRXX.12BA206-BID17.Cluster38  | 2 521     | 0.18               | 0.04               | Bacteria, Proteobacteria, Gammaproteobacteria, Alteromonadales, Pseudoalteromonadales, Pseudoalteromonas | 100.00 % | 100.00 %       |  |

**Supplementary Table 1.** List of abbreviations used in this study.

| <b>Abreviation</b> | <b>Description</b>                                               |
|--------------------|------------------------------------------------------------------|
| BID                | Barcode IDentifier                                               |
| BR                 | Broad Range                                                      |
| CDIV               | Coral DIVersity                                                  |
| EMBL-EBI           | EMBL European Bioinformatics Institute                           |
| ENA                | European Nucleotide Archive                                      |
| FFR                | Fe-based virus Flocculation, Filtration, and Resuspension method |
| HS                 | High Sensitivity                                                 |
| LIMS               | Laboratory Information Management System                         |
| NC                 | Negative Controls                                                |
| NGL                | Next Generation Laboratory Information Management System         |
| NGL-BI             | NGL-BioInformatics                                               |
| NGL-P              | NGL-Project management                                           |
| NGL-S              | NGL- Sample management                                           |
| NGL-SQ             | NGL- SeQuencing                                                  |
| NGL-SUB            | NGL- SUBmission                                                  |
| NGS-QC             | NGS- Quality Control                                             |
| OTU                | Operational Taxonomic Unit                                       |
| R1, R2             | Paired reads (Read 1, Read 2)                                    |
| RIN                | RNA Integrity Number                                             |
| rRNA               | ribosomal RNA                                                    |
| RTA                | Illumina Real Time Analysis                                      |

**Supplementary Table 2.** Barcode Identifier (BID) sequences

| <b>BID name</b> | <b>Sequence</b> | <b>BID name</b> | <b>Sequence</b> |
|-----------------|-----------------|-----------------|-----------------|
| <b>Bid01</b>    | GTGTACAT        | <b>Bid18</b>    | CGAGTCGT        |
| <b>Bid02</b>    | TATGTCAG        | <b>Bid19</b>    | ACACACAC        |
| <b>Bid03</b>    | TAGTCGCA        | <b>Bid20</b>    | GTACGACT        |
| <b>Bid04</b>    | TACTATAC        | <b>Bid21</b>    | ATGATCGC        |
| <b>Bid05</b>    | ACTAGATC        | <b>Bid22</b>    | CATCAGTC        |
| <b>Bid06</b>    | GATCGCGA        | <b>Bid23</b>    | GATGATCT        |
| <b>Bid07</b>    | CGCTCTCG        | <b>Bid24</b>    | CTGCGTAC        |
| <b>Bid08</b>    | GTCGTAGA        | <b>Bid25</b>    | AGCGACTA        |
| <b>Bid09</b>    | GTCACGTC        | <b>Bid26</b>    | TCAGTGTC        |
| <b>Bid10</b>    | GCGTCAGC        | <b>Bid27</b>    | CTATGCTA        |
| <b>Bid11</b>    | TGACATCA        | <b>Bid28</b>    | TCGCGCTG        |
| <b>Bid12</b>    | ACATGTGT        | <b>Bid29</b>    | AGCACAGT        |
| <b>Bid13</b>    | AGACTATG        | <b>Bid30</b>    | TAGCTAGT        |
| <b>Bid14</b>    | ACGACGAG        | <b>Bid31</b>    | AGTGCTAC        |
| <b>Bid15</b>    | TCTACTGA        | <b>Bid32</b>    | CGTATACA        |
| <b>Bid16</b>    | ACTCTGCT        | <b>Bid33</b>    | CACATGAT        |
| <b>Bid17</b>    | ATATAGCG        |                 |                 |

**Supplementary Table 3: PCR mixtures for Metabarcoding experiments.**

| Finnyzyme Phusion® High-Fidelity PCR Master Mix with GC Buffer |                         |                         |                         |                         |                         |
|----------------------------------------------------------------|-------------------------|-------------------------|-------------------------|-------------------------|-------------------------|
| <b>Input</b>                                                   | <b>DNA &lt; 1 ng/μl</b> | <b>DNA 1 to 5 ng/μl</b> | <b>DNA &gt; 5 ng/μl</b> | <b>Positive control</b> | <b>Negative control</b> |
| <b>DNA normalization</b>                                       | <b>none</b>             | <b>1 ng/μl</b>          | <b>5 ng/μl</b>          | <b>5 ng/μl</b>          | <b>none</b>             |
| DNA input (μl)                                                 | 10                      | 10                      | 2                       | 2                       | 0                       |
| Mix Phusion 2X (μl)                                            | 12.5                    | 12.5                    | 12.5                    | 12.5                    | 12.5                    |
| Primers Forward 10 μM (μl)                                     | 1                       | 1                       | 1                       | 1                       | 1                       |
| Primers Reverse 10 μM (μl)                                     | 1                       | 1                       | 1                       | 1                       | 1                       |
| DMSO (μl)                                                      | 0.75                    | 0.75                    | 0.75                    | 0.75                    | 0.75                    |
| H2O Ambion (μl)                                                | 0                       | 0                       | 7.75                    | 7.75                    | 10                      |
| Total volume (μl)                                              | 25.25                   | 25.25                   | 25                      | 25                      | 25.25                   |

| QIAGEN Multiplex PCR Kit                |                         |                         |                         |                         |                         |
|-----------------------------------------|-------------------------|-------------------------|-------------------------|-------------------------|-------------------------|
| <b>Input</b>                            | <b>DNA &lt; 1 ng/μl</b> | <b>DNA 1 to 5 ng/μl</b> | <b>DNA &gt; 5 ng/μl</b> | <b>Positive control</b> | <b>Negative control</b> |
| <b>DNA normalization</b>                | <b>none</b>             | <b>1 ng/μl</b>          | <b>5 ng/μl</b>          | <b>5 ng/μl</b>          | <b>none</b>             |
| DNA input (μl)                          | 3                       | 3                       | 2                       | 2                       | 0                       |
| 2x QIAGEN Multiplex PCR Master Mix (μl) | 12.5                    | 12.5                    | 12.5                    | 12.5                    | 12.5                    |
| Primer F 2.5 μM (μl)                    | 2                       | 2                       | 2                       | 2                       | 2                       |
| Primer R 2.5 μM (μl)                    | 2                       | 2                       | 2                       | 2                       | 2                       |
| H2O Ambion (μl)                         | 5.5                     | 5.5                     | 6.5                     | 6.5                     | 8.5                     |
| Total volume (μl)                       | 25                      | 25                      | 25                      | 25                      | 25                      |

| Bioline, Mytaq HS kit  |                   |                         |                         |
|------------------------|-------------------|-------------------------|-------------------------|
| <b>Input</b>           | <b>DNA sample</b> | <b>Positive control</b> | <b>Negative control</b> |
| DNA input (μl)         | 4                 | 1                       | 0                       |
| MyTaq HS Mix , 2x (μl) | 12.5              | 12.5                    | 12.5                    |
| Primer F 10 μM (μl)    | 0.5               | 0.5                     | 0.5                     |
| Primer R 10 μM (μl)    | 0.5               | 0.5                     | 0.5                     |
| H2O Ambion (μl)        | 7.5               | 10.5                    | 11.5                    |
| Total volume (μl)      | 25                | 25                      | 25                      |

**Supplementary Table 4:** PCR amplification cycling protocols for metabarcoding experiments.

| Protocol       | primers name | primers sequences                                                           | expected size                                                                                 | Polymerase                             | Thermocycling |           |              | Ampure beads<br>Volume for<br>Purification |
|----------------|--------------|-----------------------------------------------------------------------------|-----------------------------------------------------------------------------------------------|----------------------------------------|---------------|-----------|--------------|--------------------------------------------|
|                |              |                                                                             |                                                                                               |                                        | Temperature   | Time      | Cycle Nb     |                                            |
| <u>16SV4V5</u> | 515F<br>926R | 5'-<br>GTGYCAGCMGCCGCGGT<br>AA-3'<br><br>5'-<br>CCGYCAATTYMTTTRAGT<br>TT-3' | 411 bp<br>for Bacteria, Archaea<br>amplification<br><br>600 bp<br>for eukaryote amplification | Phusion High-Fidelity GC<br>Master Mix | 98°C          | 30<br>sec | 25<br>cycles | 1V                                         |
|                |              |                                                                             |                                                                                               |                                        | 98°C          | 10<br>sec |              |                                            |
|                |              |                                                                             |                                                                                               |                                        | 53°C          | 30<br>sec |              |                                            |
|                |              |                                                                             |                                                                                               |                                        | 72°C          | 30<br>sec |              |                                            |
|                |              |                                                                             |                                                                                               |                                        | 72°C          | 10<br>min |              |                                            |
|                |              |                                                                             |                                                                                               |                                        | 4°C           | ∞         |              |                                            |
|                |              |                                                                             |                                                                                               | PCR amplification Master Mix           | 95°C          | 30<br>sec | 30<br>cycles |                                            |
|                |              |                                                                             |                                                                                               |                                        | 94°C          | 10<br>sec |              |                                            |
|                |              |                                                                             |                                                                                               |                                        | 53°C          | 60<br>sec |              |                                            |
|                |              |                                                                             |                                                                                               |                                        | 72°C          | 30<br>sec |              |                                            |
|                |              |                                                                             |                                                                                               |                                        | 72°C          | 10<br>min |              |                                            |
|                |              |                                                                             |                                                                                               |                                        | 4°C           | ∞         |              |                                            |
|                |              |                                                                             |                                                                                               | Mytaq HS mix                           | 95°C          | 60<br>sec | 35<br>cycles |                                            |
|                |              |                                                                             |                                                                                               |                                        | 95°C          | 15<br>sec |              |                                            |
|                |              |                                                                             |                                                                                               |                                        | 55°C          | 15<br>sec |              |                                            |
| 72°C           | 10<br>sec    |                                                                             |                                                                                               |                                        |               |           |              |                                            |
| 72°C           | 10<br>min    |                                                                             |                                                                                               |                                        |               |           |              |                                            |

|                                                                                                   |                    |                                                                                |                                                                                               |                                        |      |                              |              |              |              |      |
|---------------------------------------------------------------------------------------------------|--------------------|--------------------------------------------------------------------------------|-----------------------------------------------------------------------------------------------|----------------------------------------|------|------------------------------|--------------|--------------|--------------|------|
|                                                                                                   |                    |                                                                                |                                                                                               |                                        | 4°C  | ∞                            |              |              |              |      |
| <u>16S V4V5</u><br><u>NESTED PCR</u><br><br><u>16S Full Length</u><br><br>±<br><br><u>16SV4V5</u> | 27F<br><br>1492R   | 5'-<br>AGAGTTTGATCMTGGCTC<br>AG-3'<br><br>5'-<br>TACGGYTACCTTGTTACG<br>ACTT-3' | 1400 bp                                                                                       | Phusion High-Fidelity GC<br>Master Mix | 98°C | 5 min                        | 20<br>cycles | 1V           |              |      |
|                                                                                                   |                    |                                                                                |                                                                                               |                                        | 98°C | 30 sec                       |              |              |              |      |
|                                                                                                   |                    |                                                                                |                                                                                               |                                        | 55°C | 30 sec                       |              |              |              |      |
|                                                                                                   |                    |                                                                                |                                                                                               |                                        | 72°C | 60 sec                       |              |              |              |      |
|                                                                                                   |                    |                                                                                |                                                                                               |                                        | 72°C | 10 min                       |              |              |              |      |
|                                                                                                   | 4°C                | ∞                                                                              |                                                                                               |                                        |      |                              |              |              |              |      |
|                                                                                                   | 515F<br><br>926R   | 5'-<br>GTGYCAGCMGCCGCGGT<br>AA-3'<br><br>5'-<br>CCGYCAATTYMTTTRAGT<br>TT-3'    | 411 bp<br>for Bacteria, Archaea<br>amplification<br><br>600 bp<br>for eukaryote amplification |                                        |      | 98°C                         | 30 sec       | 25<br>cycles | 1V           |      |
|                                                                                                   |                    |                                                                                |                                                                                               |                                        |      | 98°C                         | 10 sec       |              |              |      |
|                                                                                                   |                    |                                                                                |                                                                                               |                                        |      | 53°C                         | 30 sec       |              |              |      |
|                                                                                                   |                    |                                                                                |                                                                                               |                                        |      | 72°C                         | 30 sec       |              |              |      |
| 72°C                                                                                              |                    |                                                                                |                                                                                               | 10 min                                 |      |                              |              |              |              |      |
| 4°C                                                                                               | ∞                  |                                                                                |                                                                                               |                                        |      |                              |              |              |              |      |
| <u>18SV9</u>                                                                                      | 1389F<br><br>1510R | 5'-TTGTACACACCGCCC-3'<br><br>5'-<br>CCTTCYGCAGGTTACCT<br>AC-3'                 | 150-170 bp                                                                                    | Phusion High-Fidelity GC<br>Master Mix | 98°C | 30 sec                       | 25<br>cycles | 1.8V         |              |      |
|                                                                                                   |                    |                                                                                |                                                                                               |                                        | 98°C | 10 sec                       |              |              |              |      |
|                                                                                                   |                    |                                                                                |                                                                                               |                                        | 57°C | 30 sec                       |              |              |              |      |
|                                                                                                   |                    |                                                                                |                                                                                               |                                        | 72°C | 30 sec                       |              |              |              |      |
|                                                                                                   |                    |                                                                                |                                                                                               |                                        | 72°C | 10 min                       |              |              |              |      |
|                                                                                                   | 4°C                | ∞                                                                              |                                                                                               |                                        |      |                              |              |              |              |      |
|                                                                                                   |                    |                                                                                |                                                                                               |                                        |      | PCR amplification Master Mix | 95°C         | 15 min       | 30<br>cycles | 1.8V |
|                                                                                                   |                    |                                                                                |                                                                                               |                                        |      |                              | 94°C         | 30 sec       |              |      |

|                         |               |                                         |        |                                        |      |        |              |    |
|-------------------------|---------------|-----------------------------------------|--------|----------------------------------------|------|--------|--------------|----|
|                         |               |                                         |        |                                        | 57°C | 60 sec |              |    |
|                         |               |                                         |        |                                        | 72°C | 30 sec |              |    |
|                         |               |                                         |        |                                        | 72°C | 10 min |              |    |
|                         |               |                                         |        |                                        | 4°C  | ∞      |              |    |
| ITS2<br>Symbiodiniaceae | SYM_VAR_5.8S2 | 5'-<br>GAATTGCAGAACTCCGTG<br>AACC-3'    | 300 bp | Phusion High-Fidelity GC<br>Master Mix | 98°C | 2 min  | 30<br>cycles | 1V |
|                         |               |                                         |        |                                        | 98°C | 30 sec |              |    |
|                         |               |                                         |        |                                        | 56°C | 30 sec |              |    |
|                         |               |                                         |        |                                        | 72°C | 30 sec |              |    |
|                         |               |                                         |        |                                        | 72°C | 5 min  |              |    |
|                         |               |                                         |        |                                        | 4°C  | ∞      |              |    |
|                         | SYM_VAR_REV   | 5'-<br>CGGGTTCWCTTGTYTGA<br>CTTCATGC-3' | 300 bp | PCR amplification Master Mix           | 95°C | 15 min | 35<br>cycles | 1V |
|                         |               |                                         |        |                                        | 94°C | 30 sec |              |    |
|                         |               |                                         |        |                                        | 56°C | 60 sec |              |    |
|                         |               |                                         |        |                                        | 72°C | 90 sec |              |    |
|                         |               |                                         |        |                                        | 72°C | 10 min |              |    |
|                         |               |                                         |        |                                        | 4°C  | ∞      |              |    |
